# Supplementary material for: Thermal hysteresis in dithiadiazolyl and dithiazolyl radicals induced by supercooling of paramagnetic liquids close to room temperature: a study of F3CCNSSN and an interpretation of the behaviour of F3CCSNSCCF3
Source: Royal Society of Chemistry journal article supplement (doi:10.1039/b202627a), 2002-01-01
Supplement: b202627a.doc [file b202627a.doc]

#### Supplementary Information

### SUP-01: Synthesis of 1

CF3CNSNS was generated by reduction of [CF3CNSNS][AsF6] with Na2S2O4 in SO2. Fractional distillation of the volatile materials through U-tube traps at 0oC, -15oC and –196oC gave pure 1 (ca. 75%) as a red-black crystalline solid in the –15oC trap. The purity of the radical was established by its mass spectrum and elemental analyses and by comparison of its EPR and IR data with published spectra.6 Full experimental details are given in ref. 5b. The density of the liquid and vapor pressure measurements were obtained as described for **2** in ref. 10.

**SUP-02:** Packing diagrams for **1** and **2**

Extended S…N interactions in **1** occur along the crystallographic z-axis linking tetramers into chains. These supramolecular chains are separated by F...F repulsions between trifluoromethyl groups. This should be compared with F3CCSNSCCF3 which bears two CF3 functionalities and forms discrete tetramers separated by F...F repulsions. The fewer ‘protecting’ CF3 groups in CF3CNSSN provides a more extended web of intermolecular S...N contacts.

|  |  |
| --- | --- |
| **1** | **2** |

### SUP-03: *Ab initio* calculations on the modes of association of 1 and 2

Dimerisation energy at the B86P86/SVP [BP86/TZVPP] level of **1** leading to **1** -31 [-17] kJ/mol; **1** -33 [-22] kJ/mol; **1** -8 [-4] kJ/mol. We note that for both **1** and **2** triplets were obtained, and not singlets, as this method does not include the required electron correlation [W.T Borden in *Diradicals* (W.T. Borden Ed., J. Wiley and Sons. N.Y., 1982)] which is expected at this level of calculation.

**   1  **

*Ab initio* calculations using mpw1pw91/6-31+G* indicate that **2** is not a stationary point and is unstable by -33.3 kJ/mol with respect to 2 monomers., *cf* -9.6 kJ/mol for the electrostatic dimer **2** at the same level. The B86P86 method gives similar stability -12.2 kJ/mol) to the electrostatic dimer **2**. The *-* interaction observed in the crystal structure of **2** arises through the additional electrostatic stabilisation afforded by formation of a tetramer (2 dimers ® tetramer : H = –49.6 kJ/mol). Qualitatively similar results were obtained with mPW1PW91/6-31+G* and B3PW91/6-31G* basis sets. The trans arrangement **2** is also unstable by 24.2kJ/mol using the B86P86/SVP method.

**2  2 **

The electrostatic energies estimated by using the simple electrostatic model based on the calculated charges are as follows [mPW1PW91/6-31+G* Mulliken charges (mPW1PW91/6-31G* NBO charges)] 12.5 (51.7) kJ/mol for **2**, -4.6 (-16.5) kJ/mol for **2**

**SUP-04:** Molecular electrostatic potential maps for **1** and **2** and a comparison of the calculated charge distribution for **2** using semi-empirical and *ab initio* methods.

Electrostatic isopotentials were calculated using the PM3 method using Quantum Cache. PM3 produced the closest geometry to the crystal data of the MNDO methods available. The molecular electrostatic potential map shown utilises the crystal geometry, but does not differ substantially from the MEP determined using the geometry-optimised structure.

|  |  |
| --- | --- |
| (a) | (b) |

Previous theoretical studies on the radical **2** have indicated substantial variation in calculated point charges. Semi-empirical calculations are qualitatively similar and we have found little variation in the general trend which favours intermolecular S+…N- interactions between rings. It should be noted that the strength of the interaction is dependent on the partial charges and is sensitive to the methodology employed.

| Method | F | Exo-C | C | N | S |
| --- | --- | --- | --- | --- | --- |
| Mulliken (UB3PW91/6-31G*)a | -0.404 | 1.293 | -0.336 | -0.766 | 0.636 |
| Mulliken (UMPW1PW91/6-31+G*)a | -0.271 | 1.075 | -0.480 | -0.429 | 0.431 |
| N.B.O. (UMPW1PW91/6-31+G*)a | -0.346 | 1.093 | -0.340 | -0.846 | 0.706 |
| MOPAC/PM3 | -0.125 | 0.435 | -0.323 | -0.454 | 0.481 |
| MOPAC/MNDO | -0.213 | 0.682 | -0.378 | -0.775 | 0.734 |
| MOPAC/AM1 | -0.143 | 0.499 | -0.460 | -0.806 | 0.804 |

a Ref. 10

**SUP-05** Modelling the magnetic exchange interaction in **1** and **2**

The modelling of the abrupt change in magnetism at the solid-liquid phase transition was carried out using the domain model of Sorai and Seki (*J. Phys. Chem. Solids*, 1974,**35**, 555) which was originally used to model the high-spin/low-spin transition in coordination complexes. The domain model utilises knowledge of the thermodynamic properties (H and T) at the phase transition and assumes that there are domains of each phase of uniform size around the transition temperature. The number of molecules per domain (*n*) determines the rate at which the phase transition is complete. In HS-LS transitions the transition may be broad, occuring over a wide temperature. In the case of solid-liquid transitions the transition is necessarily abrupt and large values of *n* are expected.

The fraction of molecules, *x*, in the high temperature phase is given by:

*x* = 1/[1+ exp{(*n*H/R)(1/T - 1/Tc)}]

H and Tc for **1** and **2** were determined experimentally and were fixed [Tc = Tc(obs)±1]. Values of *n* were large in order to give abrupt transitions, but allowed to vary to fit the data. The value of *n* in this case is not particularly meaningful since the abruptness of the transition depends on *n*H and so is dependent on *n* and H.

The magnetic behaviour for the system throughout the temperature range can then be described simply by

tot = (1-*x*)solid + *x*liq

In order to reduce the number of variables, solid was assumed to be zero, i.e. both **1** and **2** are entirely diamagnetic in the solid state. A number of different equations were utilised to attempt to model the liquid state behaviour.

- Curie-Weiss S=1/2 paramagnet ( = -150K)

This does not model the broad maximum in  in the liquid phase and deviates on cooling due to the inverse dependence of  on T, particularly in the super-cooled region where  is predicted to rise, but actually falls.

- An open shell exchange-coupled dimer (Bleaney-Bowers equation)

A reasonable fit to the liquid phase but some deviation in the super-cooled region.

- An equilibrium between an open-shell exchange-coupled dimer and Curie-Weiss paramagnetic monomers provided the best fit to the data, and uses the same parameters for both heating and cooling cycles.

Plots of the different curve-fits for **1** are shown below.

- - - - Curve fit for **1** using a domain model for the phase transition, assuming the liquid is a Curie-Weiss paramagnet with  = -150K

_____ Curve fit using a domain model for the phase transition, assuming the liquid is pure open-shell dimer with J = -175K

____/____ Curve fit using a domain model plus a monomer/open-shell dimer equilibrium for the liquid phase utilising parameters given in the text.

**SUP-06** Curve fitting parameters for **1** and **2**. Hfus, g, Tmp and d were fixed to experimentally determined values.

| Compound | g | Hfus / kJ.mol-1 | Tmp /K | Heqm/ kJ.mol-1 | Seqm / JK-1mol-1 | d /emu.mol-1 | *J /K* | 2 |
| --- | --- | --- | --- | --- | --- | --- | --- | --- |
| **1** (T­­) | 2.010 | 4a | 307 | 19.0 | 52 | -72x10-6 | -260 | 0.4108 |
| **1** (T¯­) | 2.010 | 4 | 295 | 19.0 | 52 | -72x10-6 | -260 | 0.0230 |
| **2** (T­­) | 2.005 | 11b | 283 | 10.5 | 24 | -75x10-6 | -196 | 4.0104* |
| **2** (T¯­) | 2.005 | 11 | 266 | 10.5 | 24 | -75x10-6 | -196 | 0.0204 |

2 = { [(o – ­­c­)2/o]}/n. Refinement was carried out on  rather than T due to the insensitive nature of  with respect to T in the liquid phase. The poor goodness of fit (2 value) for **2** reflects the increase in paramagnetism prior to melting. a Preliminary result obtained from vapour pressure measurements, (Hsub - Hvap). b ref 10.
